# Supplementary material for: A new strategy for engineering a hierarchical porous carbon-anchored Fe single-atom electrocatalyst and the insights into its bifunctional catalysis for flexible rechargeable Zn–air batteries
Source: Royal Society of Chemistry journal article supplement (doi:10.1039/d0ta03457f), 2020-01-01
Supplement: d0ta03457f1.pdf [file d0ta03457f1.pdf]

## Electronic Supplementary Information

# New strategy for engineering hierarchical porous carbon-anchored Fe single-atom electrocatalyst and the insights into its bifunctional catalysis for flexible rechargeable Zn-air battery

*Cheng Du,<sup>a,c</sup> Yijing Gao,<sup>b</sup> Jianguo Wang,<sup>b,\*</sup> and Wei Chen,<sup>a, c\*</sup>*

<sup>a</sup> State Key Laboratory of Electroanalytical Chemistry, Changchun Institute of Applied Chemistry, Chinese Academy of Sciences, Changchun, Jilin 130022, China

<sup>b</sup> Institute of Industrial Catalysis, State Key Laboratory Breeding Base of Green-Chemical Synthesis Technology, College of Chemical Engineering, Zhejiang University of Technology, Hangzhou 310032, P.R. China

<sup>c</sup> University of Science and Technology of China, Hefei, Anhui 230029, P.R.China

\* Corresponding author. E-mail: [jgw@zjut.edu.cn](mailto:jgw@zjut.edu.cn); [weichen@ciac.ac.cn](mailto:weichen@ciac.ac.cn)

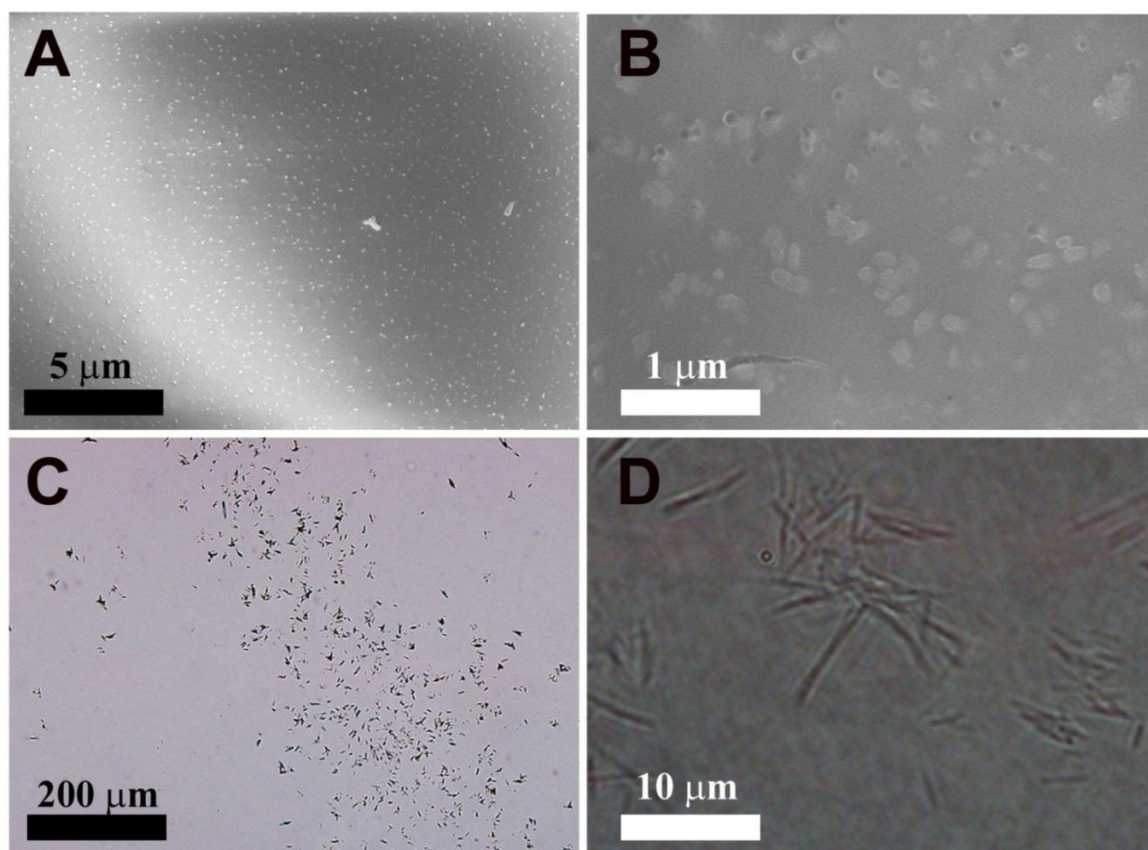

**Fig. S1** (A-B) SEM images of ferric nitrate nanocrystals after the confined recrystallization with a size of about 200 nm; (C-D) Optical microscope images of ferric nitrate salt with a size of few micrometers. Iron nitrate nonahydrate salt is easy to be decomposed under the electron beam during SEM measurement and clear image cannot be obtained; therefore optical microscope was used to characterize the size.

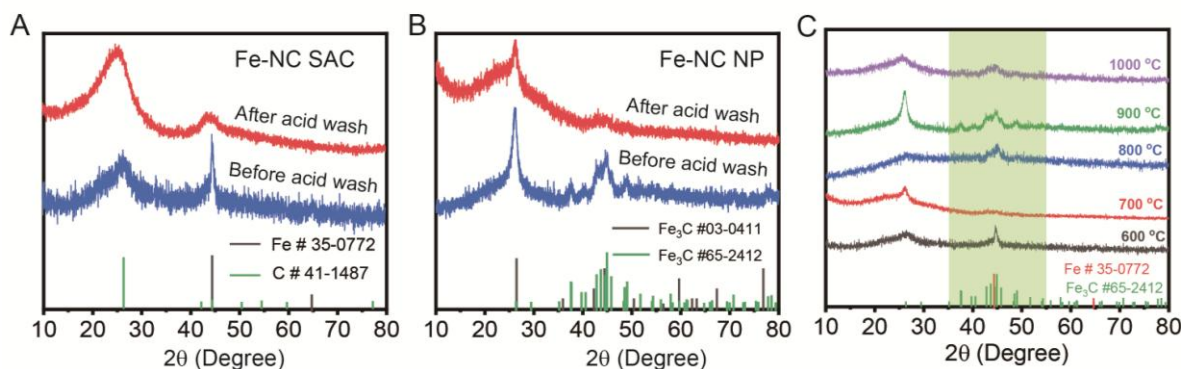

**Fig. S2** (A-B) XRD patterns of Fe-NC SAC (A) and Fe-NC NP (B) before and after acid washing; (C) XRD patterns of Fe-NC NP samples prepared under different temperatures.

In the XRD pattern of Fe-NC SAC before acid washing (Figure S2A), two obvious sharp peaks of Fe at  $44^\circ$  and  $65^\circ$  (#06-0696) are observed. However, there are only two broad peaks at  $26^\circ$  and  $42^\circ$  of carbon (#41-1487) existing in the XRD spectrum of Fe-NC SAC after acid washing, indicating the successful removal of Fe NPs by acid washing. For the Fe-NC NP, a group peaks of Fe<sub>3</sub>C (#65-2412) and a sharp peak at  $27^\circ$  belonging to Fe<sub>3</sub>C (#03-0411) apparently appear in the XRD pattern of Fe-NC NP before acid washing. After acid washing, all of these diffraction peaks of Fe<sub>3</sub>C are weakened but still exist in the XRD pattern. Such result suggests the presence of Fe<sub>3</sub>C NPs in the final Fe-NC NP sample, agreeing well with the HRTEM results. What should be noted that, the peaks of carbon are broad due to its amorphousness while the Fe or Fe<sub>3</sub>C are well crystallized with sharp diffraction peaks, which is an important basis to distinguish them in the overlapped signals.

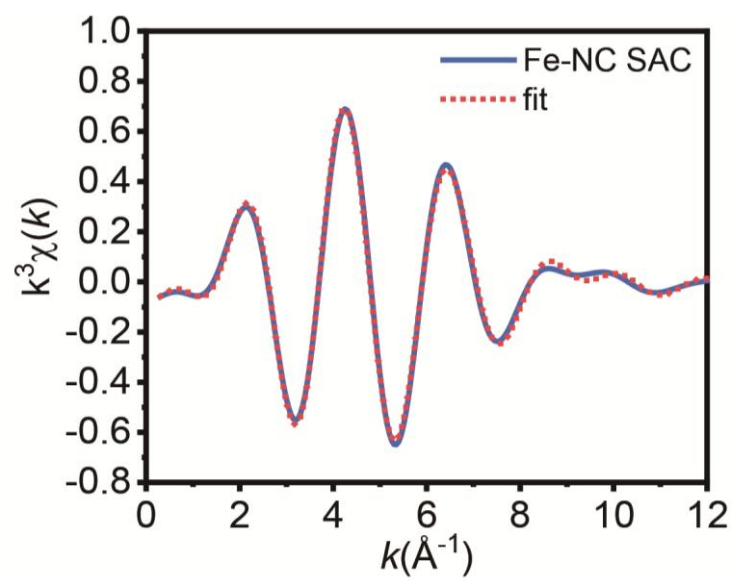

**Fig. S3** The fitting curve of Fe-NC SAC in  $k$  space.

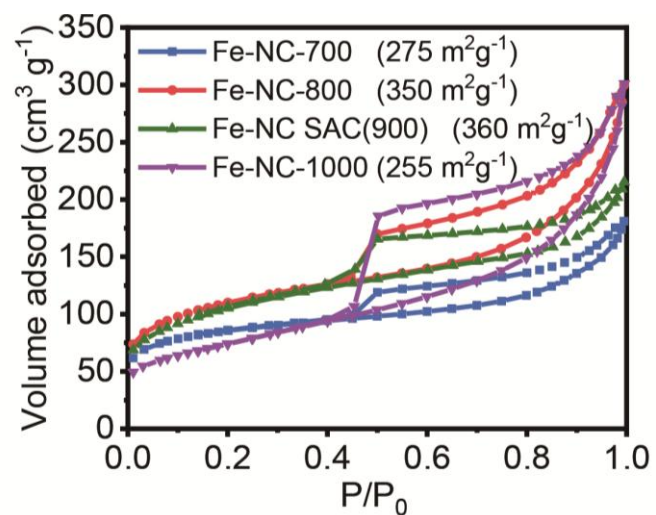

**Fig. S4** Nitrogen adsorption–desorption isotherms of Fe-NC samples prepared under different temperatures.

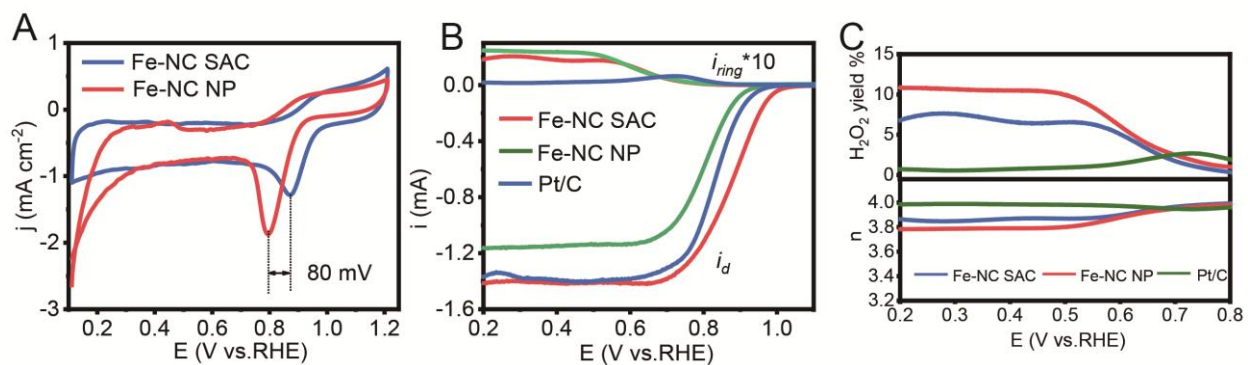

**Fig. S5** (A) CV curves of Fe-NC SAC and Fe-NC NP in O<sub>2</sub>-saturated 0.1 M KOH, scan rate: 20 mV s<sup>-1</sup>; (B) RRDE LSV curves of ORR on the Fe-NC SAC, Fe-NC NP and Pt/C at 1600 rpm, scan rate: 5 mV s<sup>-1</sup>; (C) H<sub>2</sub>O<sub>2</sub>% and n numbers calculated from the LSV curves in (B).

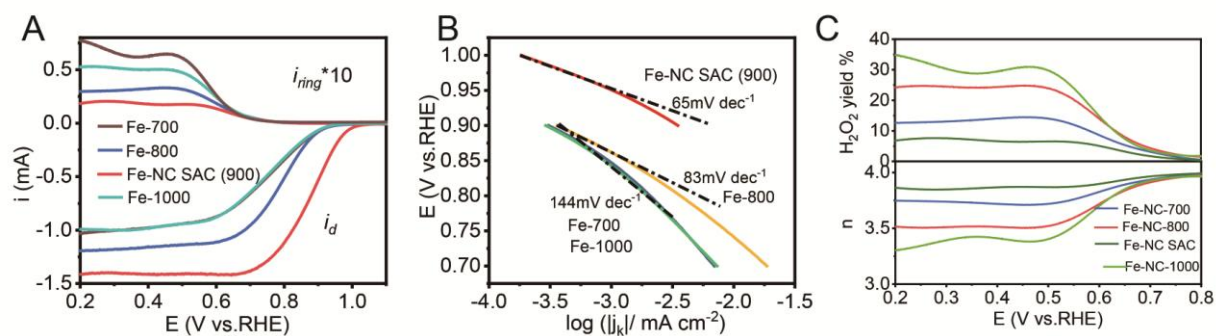

**Fig. S6** (A-C) LSV curves of ORR on RRDE under 1600 rpm (A), Tafel curves (B), and calculated  $\text{H}_2\text{O}_2$ % and  $n$  numbers (C) on the Fe-NC-T samples, scan rate:  $5 \text{ mV s}^{-1}$ .

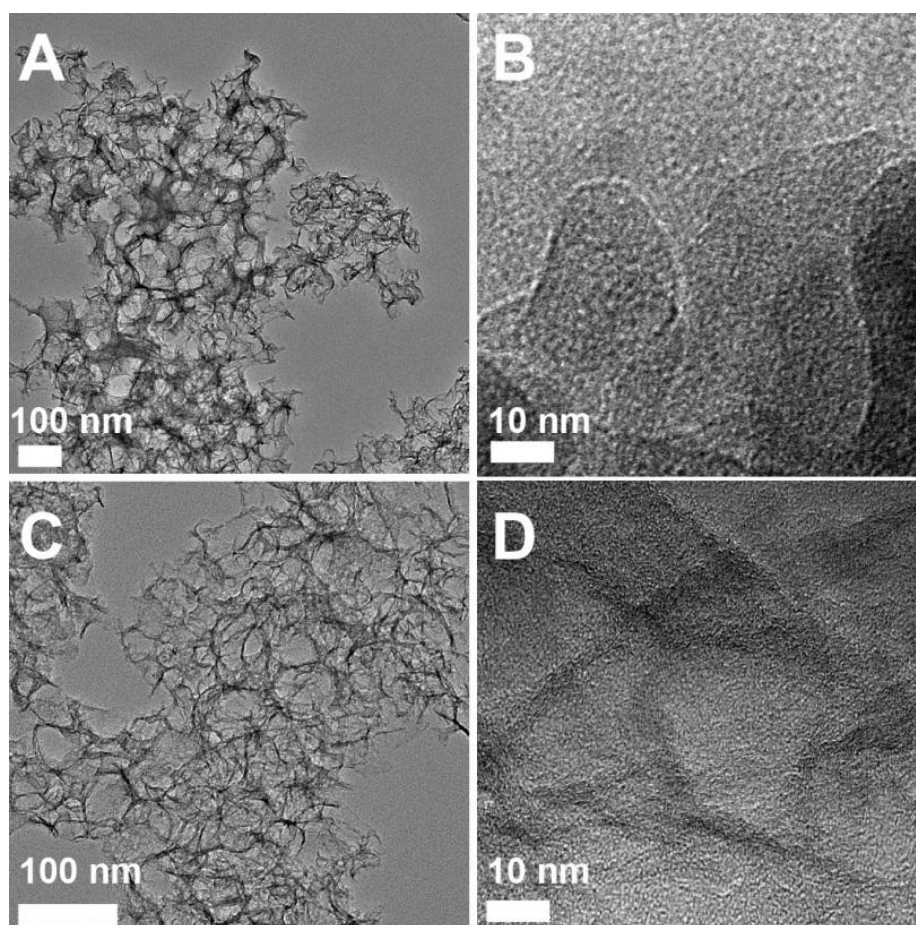

**Fig. S7** TEM images of Fe-NC SAC after ADT of ORR (A-B) and OER (C-D).



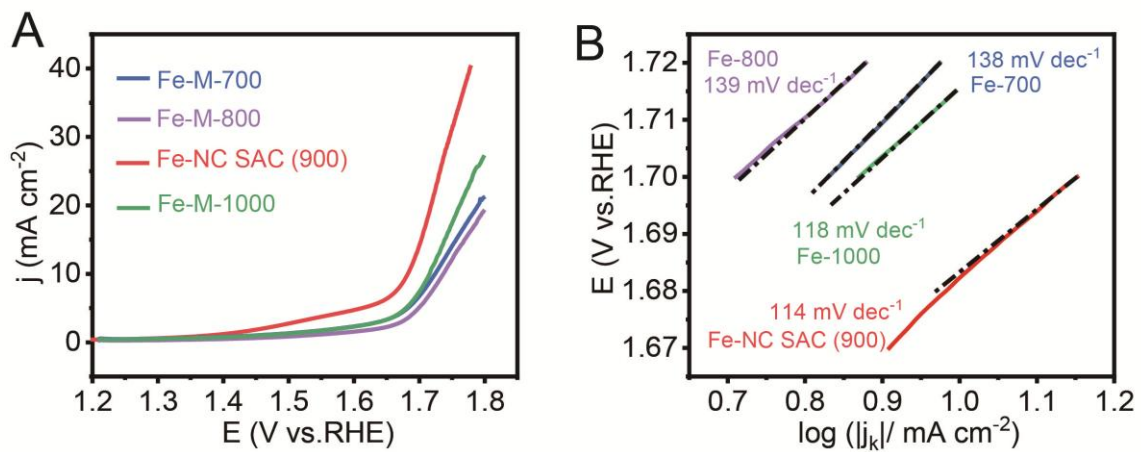

**Fig. S8** (A) LSV curves of OER on different samples under 1600 rpm with a scan rate of 5 mV s<sup>-1</sup>. (B) Tafel plots of OER on the Fe-NC-T samples.

**Table. S1** Fitted EXAFS parameters at the Fe K-edge for Fe-NC SAC

| <b>Sample</b>    | <b>Shell</b> | $N^a$      | $R$ (Å) <sup>b</sup> | $\sigma^2$ (Å <sup>2</sup> · 10 <sup>3</sup> ) <sup>c</sup> | $\Delta E_0$ (eV) <sup>d</sup> | $R$ factor (%) |
|------------------|--------------|------------|----------------------|-------------------------------------------------------------|--------------------------------|----------------|
| <b>Fe-NC SAC</b> | <b>Fe-N</b>  | <b>4.7</b> | <b>1.98</b>          | <b>8.6</b>                                                  | <b>-1.1</b>                    | <b>1.1</b>     |

<sup>a</sup>  $N$ : coordination numbers; <sup>b</sup>  $R$ : bond distance; <sup>c</sup>  $\sigma^2$ : Debye-Waller factors; <sup>d</sup>  $\Delta E_0$ : the inner potential correction.  $R$  factor: goodness of fit.

**Table. S2** The configurations and contents of different types of N in the Fe-NC SAC from XPS data.

|              | <b>Pyridinic N<br/>(398.7eV)</b> | <b>Fe-Nx<br/>(399.7eV)</b> | <b>pyrrolic N<br/>(400.8 eV)</b> | <b>graphitic N<br/>(402.3 eV)</b> | <b>oxidized N<br/>(403.5eV)</b> | <b>Total<br/>N content</b> |
|--------------|----------------------------------|----------------------------|----------------------------------|-----------------------------------|---------------------------------|----------------------------|
| Fe-NC<br>SAC | 39%                              | 12%                        | 27%                              | 16%                               | 6%                              | 1.66%                      |

**Table. S3** Pore structure data of the prepared samples obtained from the nitrogen isothermal adsorption/desorption measurements.

|                                            | Fe-NC-700 | Fe-NC-800 | Fe-NC<br>SAC | Fe-NC-1000 | Fe-NC<br>NP |
|--------------------------------------------|-----------|-----------|--------------|------------|-------------|
| S-total (cm <sup>2</sup> g <sup>-1</sup> ) | 275       | 350       | 360          | 255        | 180         |
| S-micro (cm <sup>2</sup> g <sup>-1</sup> ) | 121       | 65        | 98           | 31         | 50          |
| S-meso (cm <sup>2</sup> g <sup>-1</sup> )  | 153       | 291       | 265          | 229        | 130         |
| V-total (cm <sup>3</sup> g <sup>-1</sup> ) | 0.25      | 0.3       | 0.39         | 0.38       | 0.27        |
| V-micro (cm <sup>3</sup> g <sup>-1</sup> ) | 0.06      | 0.04      | 0.05         | 0.01       | 0.03        |
| V-meso (cm <sup>3</sup> g <sup>-1</sup> )  | 0.19      | 0.26      | 0.34         | 0.37       | 0.24        |
| Porosity                                   | 0.33      | 0.38      | 0.44         | 0.43       | 0.35        |
| Micro-porosity                             | 0.08      | 0.05      | 0.06         | 0.01       | 0.04        |
| Meso-porosity                              | 0.25      | 0.33      | 0.38         | 0.42       | 0.31        |

\* The S represents the specific surface area; V represents the specific volume.  
The porosity was calculated based on the following equation:

$$Porosity = \frac{Pore\ volume}{Pore\ volume + Carbon\ volume};$$

Here, the intrinsic density of carbon is 1.99 g cm<sup>-3</sup>. (Chem. Eng. J. 2010, 160, 398.)

**Table. S4** Comparison of the electrocatalytic activities of the reported bifunctional catalysts and the materials prepared in this work for the ORR/OER

| Catalyst                                             | $E_{1/2}$   | $E_{10}$    | $E_{10} - E_{1/2}$ | Electrolyte     | Ref                                 |
|------------------------------------------------------|-------------|-------------|--------------------|-----------------|-------------------------------------|
| <i>Fe-NC SAC</i>                                     | <b>0.88</b> | <b>1.68</b> | <b>0.8</b>         | <b>0.1M KOH</b> | <b><i>This work</i></b>             |
| Fe-NC NP                                             | 0.79        | 1.76        | 0.97               | 0.1M KOH        | This work                           |
| Pt/C+RuO <sub>2</sub>                                | 0.83        | 1.73        | 0.9                | 0.1M KOH        | This work                           |
| Co-POC (SAC)                                         | 0.83        | 1.70        | 0.87               | 0.1M KOH        | Adv. Mater. 2019, 1900592           |
| Co-N <sub>x</sub> -C (SAC)                           | 0.79        | 1.74        | 0.95               | 0.1M KOH        | Adv. Mater. 2017, 1703185           |
| Co-N,B-CSs (SAC)                                     | 0.83        | 1.66        | 0.83               | 0.1M KOH        | ACS Nano 2018, 12, 1894             |
| FeN <sub>x</sub> -PNC (SAC)                          | 0.86        | 1.64        | 0.78               | 0.1M KOH        | ACS Nano 2018, 12, 2, 1949-1958     |
| NCNF-1000                                            | 0.82        | 1.84        | 1.02               | 0.1M KOH        | Adv. Mater. 2016, 28, 3000          |
| N-GCNT/FeCo-3                                        | 0.92        | 1.73        | 0.81               | 0.1M KOH        | Adv. Energy Mater. 2017, 1602420    |
| CuS/NiS <sub>2</sub> INs                             | 0.73        | 1.52        | 0.79               | 0.1M KOH        | Adv. Funct. Mater. 2017, 1703779    |
| (NCNT) arrays                                        | 0.81        | 1.65        | 0.84               | 0.1M KOH        | Nano Energy 2017,37, 98–107         |
| DN-CP@G                                              | 0.8         | 1.79        | 0.99               | 0.1M KOH        | Adv. Energy Mater. 2018, 1703539    |
| CoS <sub>x</sub> @PCN/rGO                            | 0.78        | 1.57        | 0.79               | 0.1M KOH        | Adv. Energy Mater. 2018, 8, 1701642 |
| Ni-MnO/rGO                                           | 0.78        | 1.6         | 0.82               | 0.1M KOH        | Adv. Mater. 2018, 30, 1704609       |
| Pd@PdO-Co <sub>3</sub> O <sub>4</sub>                | 0.73        | 1.54        | 0.81               | 0.1M KOH        | Adv. Energy Mater. 2017, 1702734    |
| Ni <sub>3</sub> FeN                                  | 0.78        | 1.59        | 0.81               | 0.1M KOH        | Nano Energy 2017,39, 77–85          |
| MnCo <sub>2</sub> O <sub>4</sub>                     | 0.8         | 1.63        | 0.83               | 0.1M KOH        | Angew. Chem. 2017, 129, 15173       |
| Co <sub>3</sub> FeS <sub>1.5</sub> (OH) <sub>6</sub> | 0.72        | 1.59        | 0.87               | 0.1M KOH        | Adv. Mater. 2017, 1702327           |
| Meso-CoNC@GF                                         | 0.87        | 1.66        | 0.79               | 0.1M KOH        | Adv. Mater. 2017, 1704898           |
| CoO <sub>0.87</sub> S <sub>0.13</sub> /GN            | 0.83        | 1.59        | 0.76               | 0.1M KOH        | Adv. Mater. 2017, 1702526           |
| Mo-N/C@MoS <sub>2</sub>                              | 0.81        | 1.62        | 0.81               | 0.1M KOH        | Adv. Funct. Mater. 2017, 1702300    |
| CoZn-NC-700                                          | 0.84        | 1.62        | 0.78               | 0.1M KOH        | Adv. Funct. Mater. 2017, 1700795    |
| Ni <sub>3</sub> Fe/N-C sheets                        | 0.78        | 1.62        | 0.84               | 0.1M KOH        | Adv. Energy Mater. 2017, 7, 1601172 |
| NiCo/PFC aerogels                                    | 0.79        | 1.63        | 0.86               | 0.1M KOH        | Nano Lett. 2016, 16, 6516–6522      |

\*  $E_{1/2}$  refers to the half wave potential of ORR;

$E_{10}$  refers to the OER potential value at current density of 10 mA cm<sup>-2</sup>.

**Table. S5** Fe content in the Fe-NC SAC after ADT from ICP-AES result.

|                 | <b>Before ADT</b> | <b>ORR ADT</b> | <b>OER ADT</b> |
|-----------------|-------------------|----------------|----------------|
| <b>1st test</b> | 1.55 wt%          | 1.4 wt%        | 1.5 wt%        |
| <b>2nd test</b> | 1.45 wt%          | 1.5 wt%        | 1.4 wt%        |

The little difference should be ascribed to the instrumental error. Apparently, the content of Fe almost have no loss after ADT, indicating the excellent stability of Fe SAC.
